# Supplementary material for: Ion-Cross-Linked Hybrid Photochromic Hydrogels with Enhanced Mechanical Properties and Shape Memory Behaviour
Source: MDPI journal article supplement (doi:10.3390/polym16081031), 2024-04-10
Supplement: s1 [file s1]

**Supporting Information for**  
**Ion-Cross-Linked Hybrid Photochromic Hydrogels with**  
**Enhanced Mechanical Properties and Shape**  
**Memory Behaviour**

Shijun Long <sup>1,2,3</sup>, Fan Chen <sup>1</sup>, Han Ren <sup>1</sup>, Yali Hu <sup>1</sup>, Chao Chen <sup>4,\*</sup>, Yiwang Huang <sup>1,2</sup>  
and Xuefeng Li <sup>1,2,3,\*</sup>

<sup>1</sup> *Hubei Provincial Key Laboratory of Green Materials for Light Industry, Hubei University of Technology, Wuhan 430068, China; longshijun.hp@163.com (S.L.); chenfan202301@163.com (F.C.); renhann@126.com (H.R.); hu\_yali1@163.com (Y.H.); yiwanghuang@hbut.edu.cn (Y.H.)*

<sup>2</sup> *Hubei Longzhong Laboratory, Xiangyang 441000, China*

<sup>3</sup> *New Materials and Green Manufacturing Talent Introduction and Innovation Demonstration Base, Hubei University of Technology, Wuhan 430068, China*

<sup>4</sup> *Hubei Key Laboratory of Polymer Materials, Hubei University, Wuhan 430062, China*

\*Correspondence: chenchao@hubu.edu.cn (C.C.); li\_xf@mail.hbut.edu.cn (X.L.)

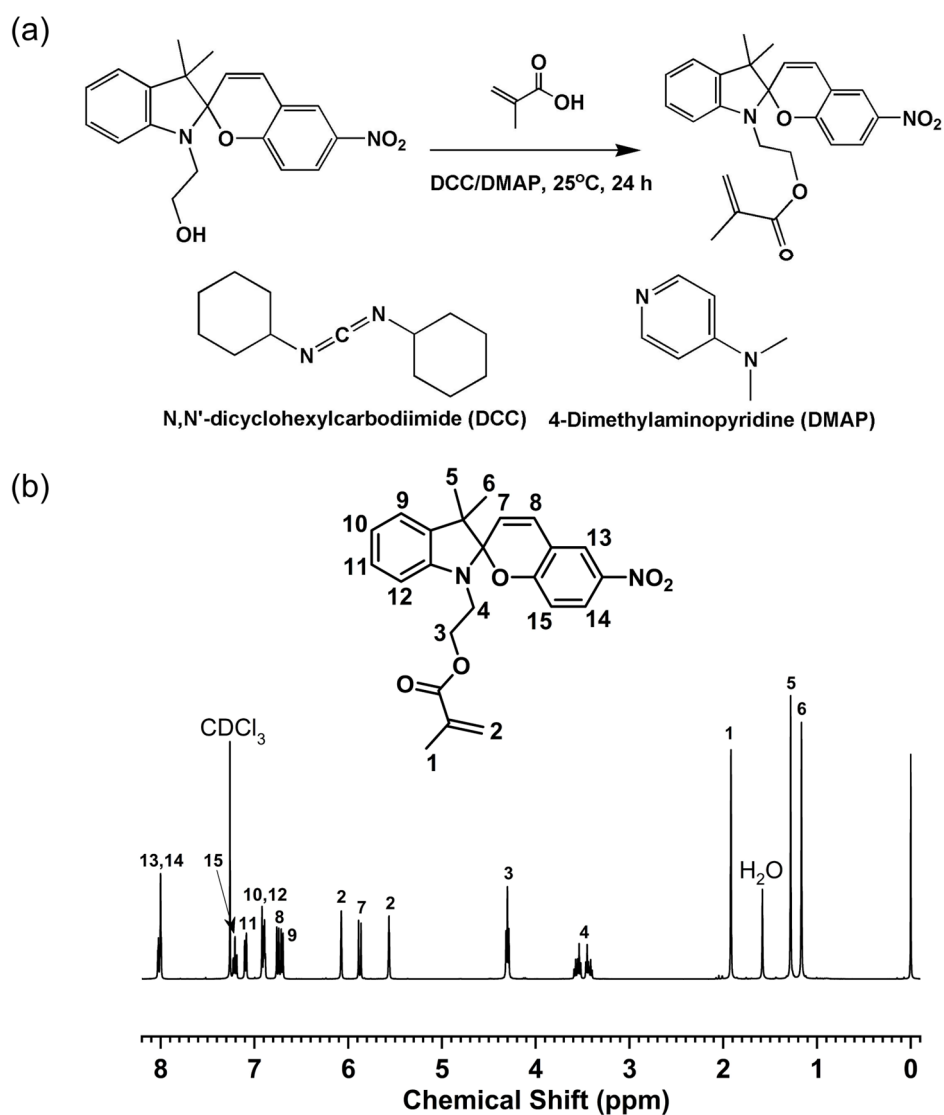

**Figure S1.** (a) The synthetic route of SPMA. (b) <sup>1</sup>H NMR spectrum of SPMA monomer (solvent CDCl<sub>3</sub>, 400MHz).

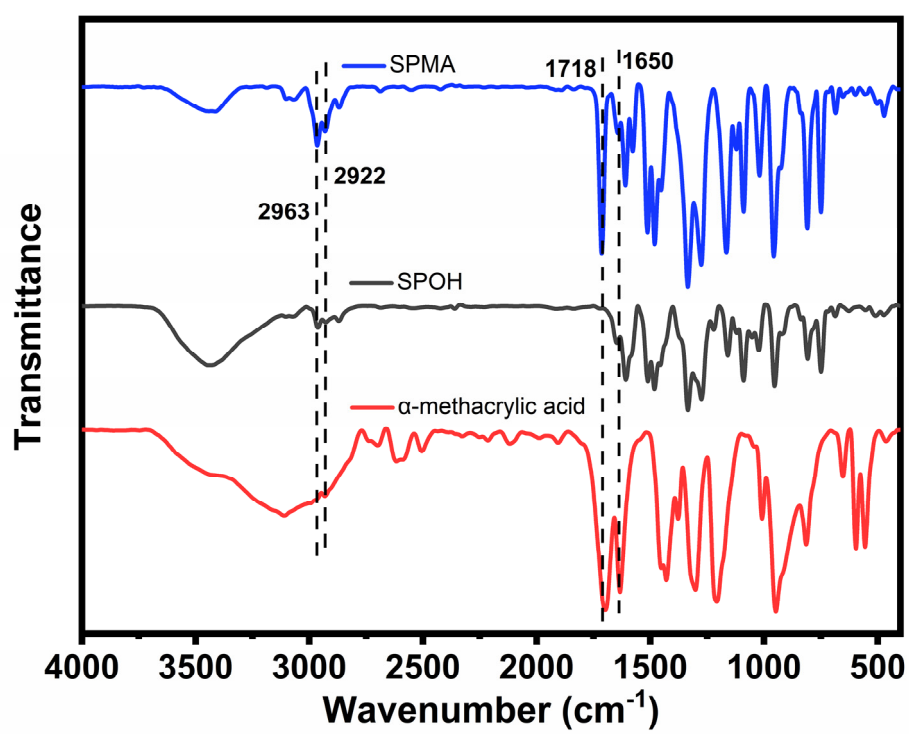

**Figure S2.** FTIR spectra of SPMA, SPOH and  $\alpha$ -methacrylic acid.

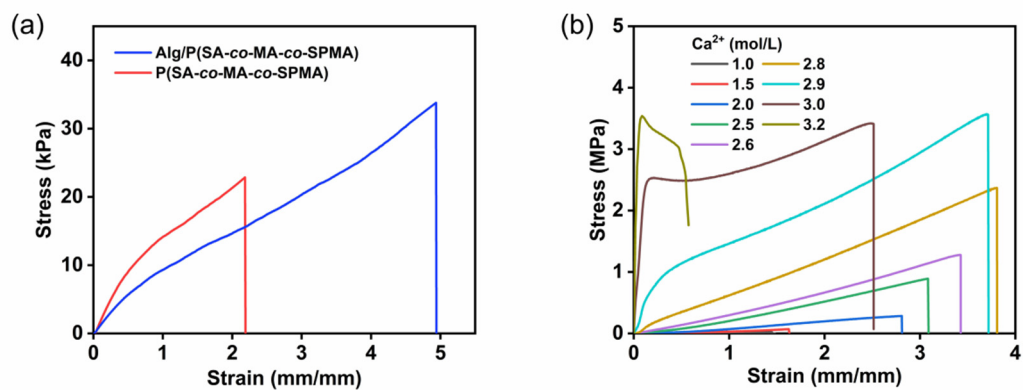

**Figure S3.** (a) Stress strain curve of P(SA-*co*-MA-*co*-SPMA) hydrogel and Alg/P(SA-*co*-MA-*co*-SPMA) hydrogel. (b) Stress strain curve of Alg/P(SA-*co*-MA-*co*-SPMA)/Ca<sup>2+</sup> hydrogels soaked in solutions at different Ca<sup>2+</sup> concentrations.

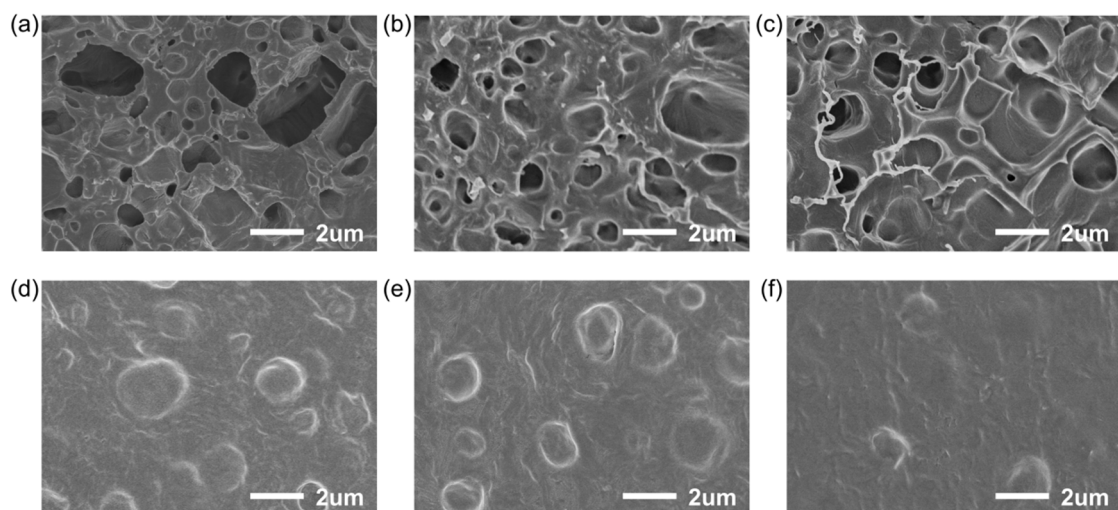

**Figure S4.** SEM images for cross-sectional morphology of hydrogels (scale bar = 2  $\mu\text{m}$ ). (a) P(SA-*co*-MA-*co*-SPMA) hydrogel. (b) Alg/P(SA-*co*-MA-*co*-SPMA) hydrogel. (c) Alg/P(SA-*co*-MA-*co*-SPMA)/Ca<sup>2+</sup><sub>2.0M</sub> hydrogel. (d) Alg/P(SA-*co*-MA-*co*-SPMA)/Ca<sup>2+</sup><sub>2.6M</sub> hydrogel. (e) Alg/P(SA-*co*-MA-*co*-SPMA)/Ca<sup>2+</sup><sub>2.8M</sub> hydrogel. (f) Alg/P(SA-*co*-MA-*co*-SPMA)/Ca<sup>2+</sup><sub>3.0M</sub> hydrogel.

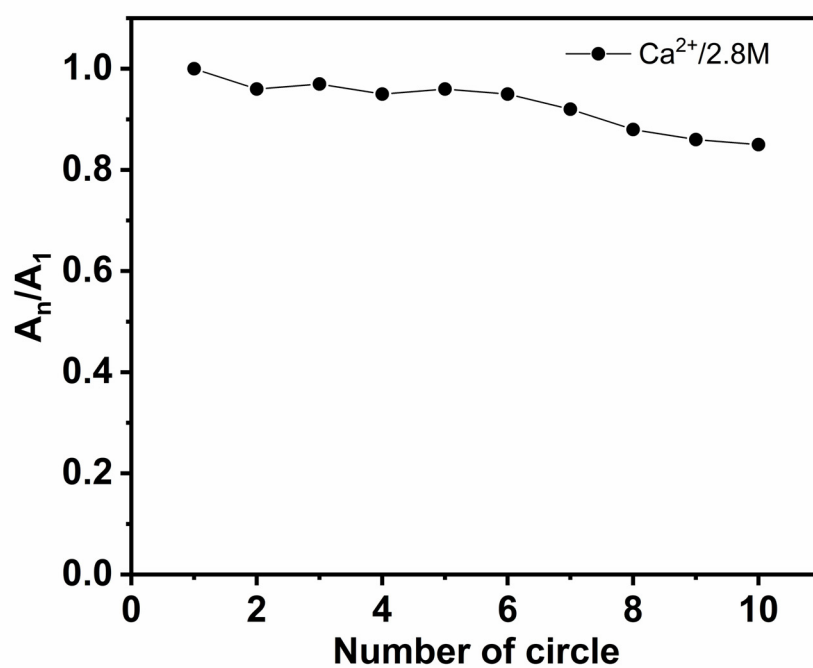

**Figure S5.** Changes of  $A_n/A_1$  during repeated coloration/discolorization cycle of Alg/P(SA-co-MA-co-SPMA)/ $\text{Ca}^{2+}_{2.8\text{M}}$  hydrogel irradiated by alternative UV/vis light, where  $A_1$  and  $A_n$  represent the intensities for the first and nth cycles at the maximum absorption wavelength.

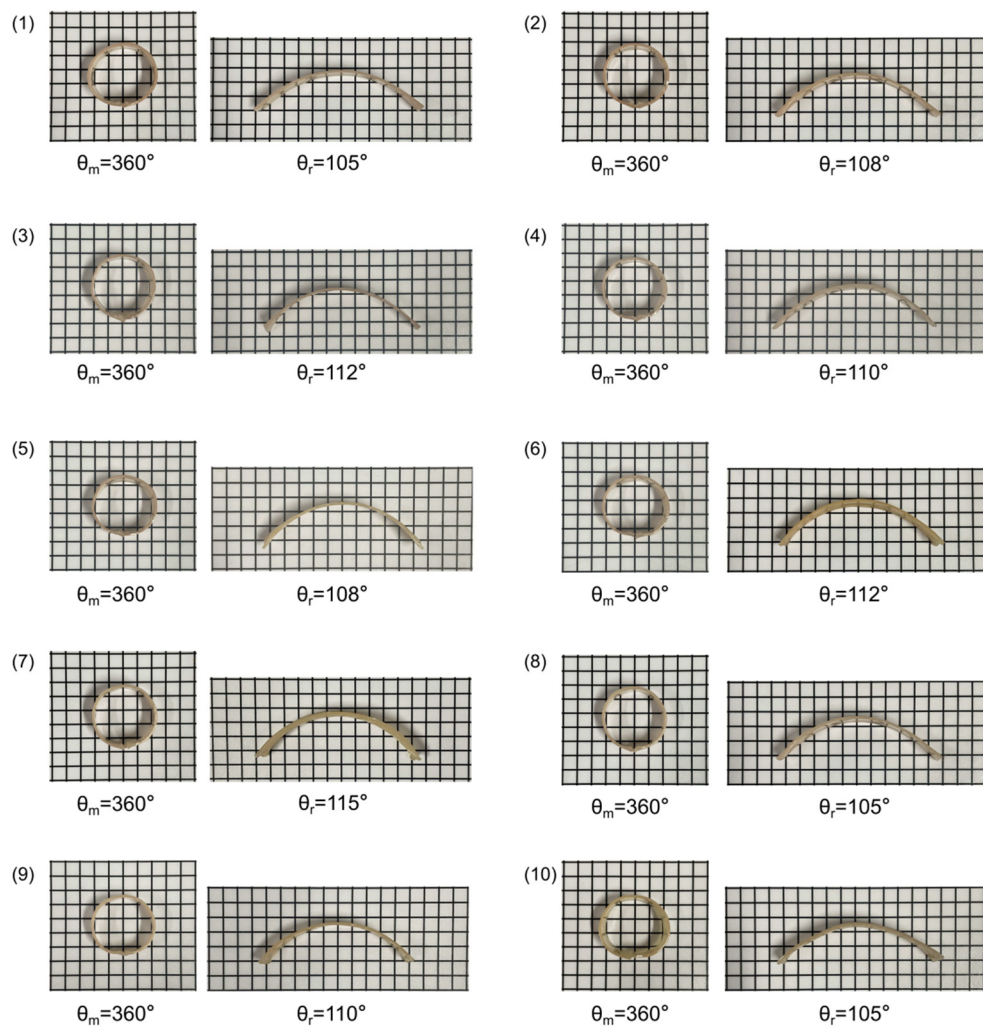

**Figure S6.** The photos of Alg/P(SA-co-MA-co-SPMA)/Ca<sup>2+</sup><sub>2.8M</sub> hydrogel conducting 10 cycles of shape fixation and shape recovery.

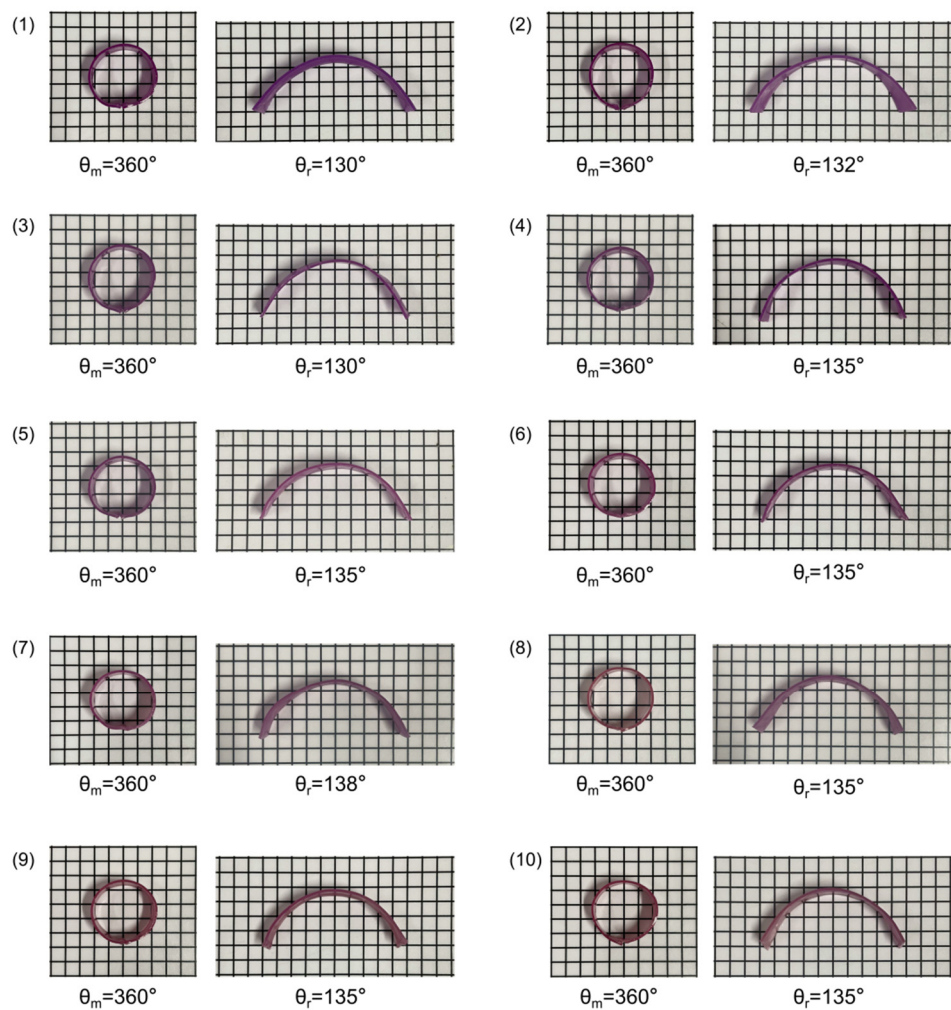

**Figure S7.** The photos of Alg/P(SA-*co*-MA-*co*-SPMA)/Ca<sup>2+</sup><sub>2.8M</sub> hydrogel conducting 10 cycles of shape fixation and shape recovery under UV irradiation.
